# Supplementary material for: Rate coefficients for the reactions of OH radical with C3-C11 alkanes determined by the relative rate technique
Source: Copernicus journal article supplement (doi:10.5194/egusphere-2023-2802), 2023-12-05
Supplement: Supplementary file 1 [file egusphere-2023-2802-supplement.pdf]

## **Supplementary:Material**

### **Rate coefficients for the reactions of OH radical with C3-C11 alkanes determined by the relative rate technique**

Yanyan Xin <sup>1,2</sup>, Xiaoxiu Lun <sup>1</sup>, Shuyang Xie <sup>2</sup>, Junfeng Liu <sup>2</sup>, Chengtang Liu <sup>2\*</sup>, Yujing Mu <sup>2</sup>

<sup>1</sup> Beijing Forestry University, Beijing, 100083, China

<sup>2</sup> Research Center for Eco-Environmental Sciences, Chinese Academy of Sciences, Beijing, 100085, China.

\*Correspondence to: Chengtang Liu ([ctlou@rcees.ac.cn](mailto:ctlou@rcees.ac.cn)).

**This file contains, Supplementary Tables: 1-2 and Supplementary Figures:1-15**

**Table S1.** Initial conditions of the various species injected into the reactor.

| Alkanes | H <sub>2</sub> O <sub>2</sub> | N <sub>2</sub> /Air | PAMs  |
|---------|-------------------------------|---------------------|-------|
| 10 ppb  | 100 ul                        | 250 L               | 2.5 L |

**Table S2.** Rate constants for OH + Alkanes in N<sub>2</sub> and Air at 273-323 K.

| T (K)              | $K_{OH+n\text{-Hexane}}$<br>(cm <sup>3</sup> molecule <sup>-1</sup> s <sup>-1</sup> ) | Slope <sup>a</sup> | $K_{OH}^b$<br>(cm <sup>3</sup> molecule <sup>-1</sup> s <sup>-1</sup> ) | Bath gas       |
|--------------------|---------------------------------------------------------------------------------------|--------------------|-------------------------------------------------------------------------|----------------|
| 2,3-Dimethylbutane |                                                                                       |                    |                                                                         |                |
| 273                | 4.17×10 <sup>-12</sup>                                                                | 1.224±0.005        | (5.10±0.05)×10 <sup>-12</sup>                                           | Air            |
|                    |                                                                                       | 1.220              | 5.09×10 <sup>-12</sup>                                                  | N <sub>2</sub> |
| 283                | 4.44×10 <sup>-12</sup>                                                                | 1.201±0.008        | (5.33±0.07)×10 <sup>-12</sup>                                           | Air            |
|                    |                                                                                       | 1.187              | 5.27×10 <sup>-12</sup>                                                  | N <sub>2</sub> |
| 293                | 4.70×10 <sup>-12</sup>                                                                | 1.181±0.009        | (5.55±0.09)×10 <sup>-12</sup>                                           | Air            |
|                    |                                                                                       | 1.146              | 5.39×10 <sup>-12</sup>                                                  | N <sub>2</sub> |
| 303                | 4.97×10 <sup>-12</sup>                                                                | 1.126±0.004        | (5.60±0.04)×10 <sup>-12</sup>                                           | Air            |
|                    |                                                                                       | 1.134              | 5.64×10 <sup>-12</sup>                                                  | N <sub>2</sub> |
| 313                | 5.22×10 <sup>-12</sup>                                                                | 1.091±0.001        | (5.70±0.01)×10 <sup>-12</sup>                                           | Air            |
|                    |                                                                                       | 1.088              | 5.68×10 <sup>-12</sup>                                                  | N <sub>2</sub> |
| 323                | 5.48×10 <sup>-12</sup>                                                                | 1.061±0.001        | (5.82±0.01)×10 <sup>-12</sup>                                           | Air            |
|                    |                                                                                       | 1.052              | 5.76×10 <sup>-12</sup>                                                  | N <sub>2</sub> |
| Methylcyclopentane |                                                                                       |                    |                                                                         |                |
| 273                | 4.17×10 <sup>-12</sup>                                                                | 1.544±0.006        | (6.44±0.03)×10 <sup>-12</sup>                                           | Air            |
|                    |                                                                                       | 1.515              | 6.32×10 <sup>-12</sup>                                                  | N <sub>2</sub> |
| 283                | 4.44×10 <sup>-12</sup>                                                                | 1.447±0.040        | (6.43±0.18)×10 <sup>-12</sup>                                           | Air            |
|                    |                                                                                       | 1.478              | 6.56×10 <sup>-12</sup>                                                  | N <sub>2</sub> |
| 293                | 4.70×10 <sup>-12</sup>                                                                | 1.417±0.016        | (6.66±0.08)×10 <sup>-12</sup>                                           | Air            |
|                    |                                                                                       | 1.448              | 6.80×10 <sup>-12</sup>                                                  | N <sub>2</sub> |
| 303                | 4.97×10 <sup>-12</sup>                                                                | 1.398±0.014        | (6.95±0.07)×10 <sup>-12</sup>                                           | Air            |
|                    |                                                                                       | 1.430              | 7.11×10 <sup>-12</sup>                                                  | N <sub>2</sub> |
| 313                | 5.22×10 <sup>-12</sup>                                                                | 1.388±0.002        | (7.24±0.01)×10 <sup>-12</sup>                                           | Air            |
|                    |                                                                                       | 1.359              | 7.09×10 <sup>-12</sup>                                                  | N <sub>2</sub> |
| 323                | 5.48×10 <sup>-12</sup>                                                                | 1.337±0.010        | (7.33±0.05)×10 <sup>-12</sup>                                           | Air            |
|                    |                                                                                       | 1.334              | 7.31×10 <sup>-12</sup>                                                  | N <sub>2</sub> |
| n-Heptane          |                                                                                       |                    |                                                                         |                |
| 273                | 4.17×10 <sup>-12</sup>                                                                | 1.287±0.040        | (5.37±0.17)×10 <sup>-12</sup>                                           | Air            |
|                    |                                                                                       | 1.288              | 5.37×10 <sup>-12</sup>                                                  | N <sub>2</sub> |

|                 |                        |             |                               |                |
|-----------------|------------------------|-------------|-------------------------------|----------------|
| 283             | 4.44×10 <sup>-12</sup> | 1.308±0.020 | (5.81±0.09)×10 <sup>-12</sup> | Air            |
|                 |                        | 1.340       | 5.95×10 <sup>-12</sup>        | N <sub>2</sub> |
| 293             | 4.70×10 <sup>-12</sup> | 1.311±0.049 | (6.16±0.23)×10 <sup>-12</sup> | Air            |
|                 |                        | 1.318       | 6.19×10 <sup>-12</sup>        | N <sub>2</sub> |
| 303             | 4.97×10 <sup>-12</sup> | 1.323±0.011 | (6.58±0.06)×10 <sup>-12</sup> | Air            |
|                 |                        | 1.312       | 6.52×10 <sup>-12</sup>        | N <sub>2</sub> |
| 313             | 5.22×10 <sup>-12</sup> | 1.359±0.005 | (7.09±0.01)×10 <sup>-12</sup> | Air            |
|                 |                        | 1.275       | 6.66×10 <sup>-12</sup>        | N <sub>2</sub> |
| 323             | 5.48×10 <sup>-12</sup> | 1.318±0.005 | (7.22±0.03)×10 <sup>-12</sup> | Air            |
|                 |                        | 1.264       | 6.93×10 <sup>-12</sup>        | N <sub>2</sub> |
| 3-Methylheptane |                        |             |                               |                |
| 273             | 4.17×10 <sup>-12</sup> | 1.584±0.018 | (6.61±0.07)×10 <sup>-12</sup> | Air            |
|                 |                        | 1.616       | 6.74×10 <sup>-12</sup>        | N <sub>2</sub> |
| 283             | 4.44×10 <sup>-12</sup> | 1.591±0.003 | (7.06±0.02)×10 <sup>-12</sup> | Air            |
|                 |                        | 1.643       | 7.29×10 <sup>-12</sup>        | N <sub>2</sub> |
| 293             | 4.70×10 <sup>-12</sup> | 1.612±0.076 | (7.58±0.36)×10 <sup>-12</sup> | Air            |
|                 |                        | 1.630       | 7.66×10 <sup>-12</sup>        | N <sub>2</sub> |
| 303             | 4.97×10 <sup>-12</sup> | 1.595±0.047 | (7.93±0.24)×10 <sup>-12</sup> | Air            |
|                 |                        | 1.639       | 8.14×10 <sup>-12</sup>        | N <sub>2</sub> |
| 313             | 5.22×10 <sup>-12</sup> | 1.598±0.072 | (8.34±0.38)×10 <sup>-12</sup> | Air            |
|                 |                        | 1.558       | 8.13×10 <sup>-12</sup>        | N <sub>2</sub> |
| 323             | 5.48×10 <sup>-12</sup> | 1.550±0.001 | (8.49±0.01)×10 <sup>-12</sup> | Air            |
|                 |                        | 1.526       | 8.36×10 <sup>-12</sup>        | N <sub>2</sub> |
| n-Octane        |                        |             |                               |                |
| 273             | 4.17×10 <sup>-12</sup> | 1.637±0.075 | (6.83±0.31)×10 <sup>-12</sup> | Air            |
|                 |                        | 1.607       | 6.70×10 <sup>-12</sup>        | N <sub>2</sub> |
| 283             | 4.44×10 <sup>-12</sup> | 1.642±0.007 | (7.29±0.03)×10 <sup>-12</sup> | Air            |
|                 |                        | 1.716       | 7.62×10 <sup>-12</sup>        | N <sub>2</sub> |
| 293             | 4.70×10 <sup>-12</sup> | 1.617±0.020 | 7.60±0.10)×10 <sup>-12</sup>  | Air            |
|                 |                        | 1.655       | 7.78×10 <sup>-12</sup>        | N <sub>2</sub> |
| 303             | 4.97×10 <sup>-12</sup> | 1.643±0.009 | (8.17±0.04)×10 <sup>-12</sup> | Air            |
|                 |                        | 1.687       | 8.38×10 <sup>-12</sup>        | N <sub>2</sub> |
| 313             | 5.22×10 <sup>-12</sup> | 1.689±0.041 | (8.82±0.22)×10 <sup>-12</sup> | Air            |
|                 |                        | 1.666       | 8.70×10 <sup>-12</sup>        | N <sub>2</sub> |
| 323             | 5.48×10 <sup>-12</sup> | 1.625±0.053 | (5.90±0.29)×10 <sup>-12</sup> | Air            |
|                 |                        | 1.633       | 8.95×10 <sup>-12</sup>        | N <sub>2</sub> |
| Propane         |                        |             |                               |                |
| 273             | 4.17×10 <sup>-12</sup> | 0.170       | 7.09×10 <sup>-13</sup>        | Air            |
|                 |                        | 0.167       | 6.97×10 <sup>-13</sup>        | N <sub>2</sub> |
| 283             | 4.44×10 <sup>-12</sup> | 0.181±0.041 | 8.97×10 <sup>-13</sup>        | Air            |
|                 |                        | 0.197       | 8.75×10 <sup>-13</sup>        | N <sub>2</sub> |
| 293             | 4.70×10 <sup>-12</sup> | 0.215±0.027 | (1.01±0.13)×10 <sup>-12</sup> | Air            |

|     |                        |             |                                   |                |
|-----|------------------------|-------------|-----------------------------------|----------------|
|     |                        | 0.195       | $9.14 \times 10^{-13}$            | N <sub>2</sub> |
| 303 | $4.97 \times 10^{-12}$ | 0.199±0.013 | $(9.91 \pm 0.63) \times 10^{-13}$ | Air            |
|     |                        | 0.208       | $1.04 \times 10^{-12}$            | N <sub>2</sub> |
| 313 | $5.22 \times 10^{-12}$ | 0.220±0.010 | $(1.15 \pm 0.05) \times 10^{-12}$ | Air            |
|     |                        | 0.214       | $1.12 \times 10^{-12}$            | N <sub>2</sub> |
| 323 | $5.48 \times 10^{-12}$ | 0.223±0.051 | $(1.22 \pm 0.28) \times 10^{-12}$ | Air            |
|     |                        | 0.224       | $1.23 \times 10^{-12}$            | N <sub>2</sub> |
|     |                        | Isobutane   |                                   |                |
| 273 | $4.17 \times 10^{-12}$ | 0.350±0.033 | $(1.46 \pm 0.14) \times 10^{-12}$ | Air            |
|     |                        | 0.338       | $1.41 \times 10^{-12}$            | N <sub>2</sub> |
| 283 | $4.44 \times 10^{-12}$ | 0.400±0.020 | $(1.78 \pm 0.09) \times 10^{-12}$ | Air            |
|     |                        | 0.378       | $1.68 \times 10^{-12}$            | N <sub>2</sub> |
| 293 | $4.70 \times 10^{-12}$ | 0.389±0.024 | $(1.83 \pm 0.11) \times 10^{-12}$ | Air            |
|     |                        | 0.394       | $1.85 \times 10^{-12}$            | N <sub>2</sub> |
| 303 | $4.97 \times 10^{-12}$ | 0.416±0.054 | $(2.07 \pm 0.27) \times 10^{-12}$ | Air            |
|     |                        | 0.421       | $2.09 \times 10^{-12}$            | N <sub>2</sub> |
| 313 | $5.22 \times 10^{-12}$ | 0.398±0.025 | $(2.08 \pm 0.13) \times 10^{-12}$ | Air            |
|     |                        | 0.415       | $2.17 \times 10^{-12}$            | N <sub>2</sub> |
| 323 | $5.48 \times 10^{-12}$ | 0.424±0.009 | $(2.32 \pm 0.05) \times 10^{-12}$ | Air            |
|     |                        | 0.428       | $2.34 \times 10^{-12}$            | N <sub>2</sub> |
|     |                        | n-Butane    |                                   |                |
| 273 | $4.17 \times 10^{-12}$ | 0.316±0.140 | $(1.32 \pm 0.58) \times 10^{-12}$ | Air            |
|     |                        | 0.224       | $9.34 \times 10^{-13}$            | N <sub>2</sub> |
| 283 | $4.44 \times 10^{-12}$ | 0.389±0.068 | $(1.73 \pm 0.30) \times 10^{-12}$ | Air            |
|     |                        | 0.418       | $1.86 \times 10^{-12}$            | N <sub>2</sub> |
| 293 | $4.70 \times 10^{-12}$ | 0.408±0.004 | $(1.92 \pm 0.02) \times 10^{-12}$ | Air            |
|     |                        | 0.436       | $2.05 \times 10^{-12}$            | N <sub>2</sub> |
| 303 | $4.97 \times 10^{-12}$ | 0.449±0.031 | $(2.23 \pm 0.15) \times 10^{-12}$ | Air            |
|     |                        | 0.470       | $2.34 \times 10^{-12}$            | N <sub>2</sub> |
| 313 | $5.22 \times 10^{-12}$ | 0.455±0.027 | $(2.37 \pm 0.15) \times 10^{-12}$ | Air            |
|     |                        | 0.481       | $2.51 \times 10^{-12}$            | N <sub>2</sub> |
| 323 | $5.48 \times 10^{-12}$ | 0.468±0.024 | $(2.57 \pm 0.13) \times 10^{-12}$ | Air            |
|     |                        | 0.489       | $2.68 \times 10^{-12}$            | N <sub>2</sub> |
|     |                        | Isopentane  |                                   |                |
| 273 | $4.17 \times 10^{-12}$ | 0.676±0.006 | $(2.82 \pm 0.03) \times 10^{-12}$ | Air            |
|     |                        | 0.686       | $2.86 \times 10^{-12}$            | N <sub>2</sub> |
| 283 | $4.44 \times 10^{-12}$ | 0.693±0.058 | $(3.08 \pm 0.26) \times 10^{-12}$ | Air            |
|     |                        | 0.679       | $3.01 \times 10^{-12}$            | N <sub>2</sub> |
| 293 | $4.70 \times 10^{-12}$ | 0.694±0.057 | $(3.26 \pm 0.27) \times 10^{-12}$ | Air            |
|     |                        | 0.707       | $3.32 \times 10^{-12}$            | N <sub>2</sub> |
| 303 | $4.97 \times 10^{-12}$ | 0.683±0.086 | $(3.39 \pm 0.43) \times 10^{-12}$ | Air            |
|     |                        | 0.656       | $3.26 \times 10^{-12}$            | N <sub>2</sub> |
| 313 | $5.22 \times 10^{-12}$ | 0.681±0.016 | $(3.56 \pm 0.08) \times 10^{-12}$ | Air            |

|     |                        |                    |                                   |                |
|-----|------------------------|--------------------|-----------------------------------|----------------|
|     |                        | 0.664              | $3.47 \times 10^{-12}$            | N <sub>2</sub> |
| 323 | $5.48 \times 10^{-12}$ | 0.664±0.050        | $(3.64 \pm 0.27) \times 10^{-12}$ | Air            |
|     |                        | 0.654              | $3.58 \times 10^{-12}$            | N <sub>2</sub> |
|     |                        | n-pentane          |                                   |                |
| 273 | $4.17 \times 10^{-12}$ | 0.687±0.020        | $(2.86 \pm 0.08) \times 10^{-12}$ | Air            |
|     |                        | 0.651              | $2.71 \times 10^{-12}$            | N <sub>2</sub> |
| 283 | $4.44 \times 10^{-12}$ | 0.681±0.001        | $(3.02 \pm 0.03) \times 10^{-12}$ | Air            |
|     |                        | 0.658              | $2.92 \times 10^{-12}$            | N <sub>2</sub> |
| 293 | $4.70 \times 10^{-12}$ | 0.664±0.051        | $(3.12 \pm 0.24) \times 10^{-12}$ | Air            |
|     |                        | 0.670              | $3.15 \times 10^{-12}$            | N <sub>2</sub> |
| 303 | $4.97 \times 10^{-12}$ | 0.655±0.078        | $(3.25 \pm 0.39) \times 10^{-12}$ | Air            |
|     |                        | 0.675              | $3.36 \times 10^{-12}$            | N <sub>2</sub> |
| 313 | $5.22 \times 10^{-12}$ | 0.641±0.058        | $(3.35 \pm 0.30) \times 10^{-12}$ | Air            |
|     |                        | 0.668              | $3.49 \times 10^{-12}$            | N <sub>2</sub> |
| 323 | $5.48 \times 10^{-12}$ | 0.623±0.017        | $(3.41 \pm 0.09) \times 10^{-12}$ | Air            |
|     |                        | 0.653              | $3.58 \times 10^{-12}$            | N <sub>2</sub> |
|     |                        | Cyclopentane       |                                   |                |
| 273 | $4.17 \times 10^{-12}$ | 0.898±0.049        | $(3.75 \pm 0.20) \times 10^{-12}$ | Air            |
|     |                        | 0.878              | $3.66 \times 10^{-12}$            | N <sub>2</sub> |
| 283 | $4.44 \times 10^{-12}$ | 0.918±0.006        | $(4.08 \pm 0.03) \times 10^{-12}$ | Air            |
|     |                        | 0.933              | $4.14 \times 10^{-12}$            | N <sub>2</sub> |
| 293 | $4.70 \times 10^{-12}$ | 0.972±0.021        | $(4.57 \pm 0.10) \times 10^{-12}$ | Air            |
|     |                        | 0.948              | $4.45 \times 10^{-12}$            | N <sub>2</sub> |
| 303 | $4.97 \times 10^{-12}$ | 0.949±0.001        | $(4.72 \pm 0.01) \times 10^{-12}$ | Air            |
|     |                        | 0.950              | $4.72 \times 10^{-12}$            | N <sub>2</sub> |
| 313 | $5.22 \times 10^{-12}$ | 0.993±0.007        | $(5.18 \pm 0.04) \times 10^{-12}$ | Air            |
|     |                        | 0.943              | $4.92 \times 10^{-12}$            | N <sub>2</sub> |
| 323 | $5.48 \times 10^{-12}$ | 0.959±0.003        | $(5.26 \pm 0.02) \times 10^{-12}$ | Air            |
|     |                        | 0.961              | $5.27 \times 10^{-12}$            | N <sub>2</sub> |
|     |                        | 2,2-Dimethylbutane |                                   |                |
| 273 | $4.17 \times 10^{-12}$ | 0.299±0.010        | $(1.25 \pm 0.01) \times 10^{-12}$ | Air            |
|     |                        | 0.299              | $1.25 \times 10^{-12}$            | N <sub>2</sub> |
| 283 | $4.44 \times 10^{-12}$ | 0.329±0.023        | $(1.46 \pm 0.10) \times 10^{-12}$ | Air            |
|     |                        | 0.337              | $1.49 \times 10^{-12}$            | N <sub>2</sub> |
| 293 | $4.70 \times 10^{-12}$ | 0.371±0.004        | $(1.74 \pm 0.02) \times 10^{-12}$ | Air            |
|     |                        | 0.346              | $1.63 \times 10^{-12}$            | N <sub>2</sub> |
| 303 | $4.97 \times 10^{-12}$ | 0.372±0.028        | $(1.85 \pm 0.14) \times 10^{-12}$ | Air            |
|     |                        | 0.387              | $1.92 \times 10^{-12}$            | N <sub>2</sub> |
| 313 | $5.22 \times 10^{-12}$ | 0.389±0.009        | $(2.03 \pm 0.05) \times 10^{-12}$ | Air            |
|     |                        | 0.394              | $2.06 \times 10^{-12}$            | N <sub>2</sub> |
| 323 | $5.48 \times 10^{-12}$ | 0.376±0.009        | $(2.06 \pm 0.05) \times 10^{-12}$ | Air            |
|     |                        | 0.38826            | $2.17 \times 10^{-12}$            | N <sub>2</sub> |
|     |                        | 2-Methylpentane    |                                   |                |

|                     |                        |             |                               |                |
|---------------------|------------------------|-------------|-------------------------------|----------------|
| 273                 | 4.17×10 <sup>-12</sup> | 0.938±0.002 | (3.91±0.01)×10 <sup>-12</sup> | Air            |
|                     |                        | 0.924       | 3.85×10 <sup>-12</sup>        | N <sub>2</sub> |
| 283                 | 4.44×10 <sup>-12</sup> | 0.962±0.031 | (4.17±0.14)×10 <sup>-12</sup> | Air            |
|                     |                        | 0.951       | 4.22×10 <sup>-12</sup>        | N <sub>2</sub> |
| 293                 | 4.70×10 <sup>-12</sup> | 0.982±0.002 | (4.62±0.01)×10 <sup>-12</sup> | Air            |
|                     |                        | 0.961       | 4.52×10 <sup>-12</sup>        | N <sub>2</sub> |
| 303                 | 4.97×10 <sup>-12</sup> | 0.954±0.002 | (4.74±0.01)×10 <sup>-12</sup> | Air            |
|                     |                        | 0.964       | 4.79×10 <sup>-12</sup>        | N <sub>2</sub> |
| 313                 | 5.22×10 <sup>-12</sup> | 0.957±0.028 | (5.00±0.15)×10 <sup>-12</sup> | Air            |
|                     |                        | 0.929       | 4.85×10 <sup>-12</sup>        | N <sub>2</sub> |
| 323                 | 5.48×10 <sup>-12</sup> | 0.943±0.001 | (5.17±0.01)×10 <sup>-12</sup> | Air            |
|                     |                        | 0.932       | 5.11×10 <sup>-12</sup>        | N <sub>2</sub> |
| 3-Methylpentane     |                        |             |                               |                |
| 273                 | 4.17×10 <sup>-12</sup> | 0.882±0.016 | (3.68±0.07)×10 <sup>-12</sup> | Air            |
|                     |                        | 0.908       | 3.79×10 <sup>-12</sup>        | N <sub>2</sub> |
| 283                 | 4.44×10 <sup>-12</sup> | 0.908±0.017 | (4.03±0.08)×10 <sup>-12</sup> | Air            |
|                     |                        | 0.967       | 4.30×10 <sup>-12</sup>        | N <sub>2</sub> |
| 293                 | 4.70×10 <sup>-12</sup> | 0.921±0.056 | (4.33±0.26)×10 <sup>-12</sup> | Air            |
|                     |                        | 0.951       | 4.47×10 <sup>-12</sup>        | N <sub>2</sub> |
| 303                 | 4.97×10 <sup>-12</sup> | 0.928±0.035 | (4.61±0.17)×10 <sup>-12</sup> | Air            |
|                     |                        | 0.983       | 4.88×10 <sup>-12</sup>        | N <sub>2</sub> |
| 313                 | 5.22×10 <sup>-12</sup> | 0.886±0.073 | (4.63±0.38)×10 <sup>-12</sup> | Air            |
|                     |                        | 0.940       | 4.91×10 <sup>-12</sup>        | N <sub>2</sub> |
| 323                 | 5.48×10 <sup>-12</sup> | 0.914±0.010 | (5.01±0.06)×10 <sup>-12</sup> | Air            |
|                     |                        | 0.927       | 5.08×10 <sup>-12</sup>        | N <sub>2</sub> |
| 2,4-Dimethylpentane |                        |             |                               |                |
| 273                 | 4.17×10 <sup>-12</sup> | 0.921±0.008 | (3.84±0.04)×10 <sup>-12</sup> | Air            |
|                     |                        | 0.922       | 3.84×10 <sup>-12</sup>        | N <sub>2</sub> |
| 283                 | 4.44×10 <sup>-12</sup> | 0.928±0.032 | (4.12±0.14)×10 <sup>-12</sup> | Air            |
|                     |                        | 0.943       | 4.19×10 <sup>-12</sup>        | N <sub>2</sub> |
| 293                 | 4.70×10 <sup>-12</sup> | 0.932±0.028 | (4.38±0.13)×10 <sup>-12</sup> | Air            |
|                     |                        | 0.946       | 4.45×10 <sup>-12</sup>        | N <sub>2</sub> |
| 303                 | 4.97×10 <sup>-12</sup> | 0.924±0.011 | (4.59±0.06)×10 <sup>-12</sup> | Air            |
|                     |                        | 0.929       | 4.62×10 <sup>-12</sup>        | N <sub>2</sub> |
| 313                 | 5.22×10 <sup>-12</sup> | 0.927±0.024 | (4.84±0.12)×10 <sup>-12</sup> | Air            |
|                     |                        | 0.898       | 4.69×10 <sup>-12</sup>        | N <sub>2</sub> |
| 323                 | 5.48×10 <sup>-12</sup> | 0.901±0.011 | (4.94±0.06)×10 <sup>-12</sup> | Air            |
|                     |                        | 0.878       | 4.81×10 <sup>-12</sup>        | N <sub>2</sub> |
| Cyclohexane         |                        |             |                               |                |
| 273                 | 4.17×10 <sup>-12</sup> | 1.252±0.044 | (5.22±0.18)×10 <sup>-12</sup> | Air            |
|                     |                        | 1.260       | 5.25×10 <sup>-12</sup>        | N <sub>2</sub> |
| 283                 | 4.44×10 <sup>-12</sup> | 1.310±0.033 | (5.82±0.15)×10 <sup>-12</sup> | Air            |
|                     |                        | 1.379       | 6.12×10 <sup>-12</sup>        | N <sub>2</sub> |

|     |                        |                        |                                   |                |
|-----|------------------------|------------------------|-----------------------------------|----------------|
| 293 | $4.70 \times 10^{-12}$ | 1.307±0.036            | $(6.14 \pm 0.17) \times 10^{-12}$ | Air            |
|     |                        | 1.354                  | $6.36 \times 10^{-12}$            | N <sub>2</sub> |
| 303 | $4.97 \times 10^{-12}$ | 1.310±0.050            | $(6.51 \pm 0.25) \times 10^{-12}$ | Air            |
|     |                        | 1.261                  | $6.21 \times 10^{-12}$            | N <sub>2</sub> |
| 313 | $5.22 \times 10^{-12}$ | 1.332±0.047            | $(6.96 \pm 0.25) \times 10^{-12}$ | Air            |
|     |                        | 1.243                  | $6.49 \times 10^{-12}$            | N <sub>2</sub> |
| 323 | $5.48 \times 10^{-12}$ | 1.276±0.008            | $(6.99 \pm 0.05) \times 10^{-12}$ | Air            |
|     |                        | 1.118                  | $6.13 \times 10^{-12}$            | N <sub>2</sub> |
|     |                        | 2-Methylhexane         |                                   |                |
| 273 | $4.17 \times 10^{-12}$ | 1.365±0.001            | $(5.69 \pm 0.01) \times 10^{-12}$ | Air            |
|     |                        | 1.372                  | $5.72 \times 10^{-12}$            | N <sub>2</sub> |
| 283 | $4.44 \times 10^{-12}$ | 1.347±0.046            | $(5.98 \pm 0.20) \times 10^{-12}$ | Air            |
|     |                        | 1.327                  | $5.89 \times 10^{-12}$            | N <sub>2</sub> |
| 293 | $4.70 \times 10^{-12}$ | 1.303±0.035            | $(6.12 \pm 0.16) \times 10^{-12}$ | Air            |
|     |                        | 1.280                  | $6.02 \times 10^{-12}$            | N <sub>2</sub> |
| 303 | $4.97 \times 10^{-12}$ | 1.263±0.012            | $(6.28 \pm 0.06) \times 10^{-12}$ | Air            |
|     |                        | 1.250                  | $6.21 \times 10^{-12}$            | N <sub>2</sub> |
| 313 | $5.22 \times 10^{-12}$ | 1.222±0.030            | $(6.38 \pm 0.16) \times 10^{-12}$ | Air            |
|     |                        | 1.212                  | $6.33 \times 10^{-12}$            | N <sub>2</sub> |
| 323 | $5.48 \times 10^{-12}$ | 1.184±0.029            | $(6.49 \pm 0.16) \times 10^{-12}$ | Air            |
|     |                        | 1.170                  | $6.41 \times 10^{-12}$            | N <sub>2</sub> |
|     |                        | 3-Methylhexane         |                                   |                |
| 273 | $4.17 \times 10^{-12}$ | 0.746±0.028            | $(3.11 \pm 0.12) \times 10^{-12}$ | Air            |
|     |                        | 0.875                  | $3.65 \times 10^{-12}$            | N <sub>2</sub> |
| 283 | $4.44 \times 10^{-12}$ | 0.811±0.172            | $(3.60 \pm 0.76) \times 10^{-12}$ | Air            |
|     |                        | 0.868                  | $3.85 \times 10^{-12}$            | N <sub>2</sub> |
| 293 | $4.70 \times 10^{-12}$ | 0.702±0.014            | $(3.30 \pm 0.07) \times 10^{-12}$ | Air            |
|     |                        | 0.722                  | $3.39 \times 10^{-12}$            | N <sub>2</sub> |
| 303 | $4.97 \times 10^{-12}$ | 0.701±0.153            | $(3.48 \pm 0.76) \times 10^{-12}$ | Air            |
|     |                        | 0.715                  | $3.143.55 \times 10^{-12}$        | N <sub>2</sub> |
| 313 | $5.22 \times 10^{-12}$ | 0.787±0.160            | $(4.11 \pm 0.08) \times 10^{-12}$ | Air            |
|     |                        | 0.726                  | $4.79 \times 10^{-12}$            | N <sub>2</sub> |
| 323 | $5.48 \times 10^{-12}$ | 0.824±0.107            | $(4.52 \pm 0.06) \times 10^{-12}$ | Air            |
|     |                        | 0.738                  | $4.05 \times 10^{-12}$            | N <sub>2</sub> |
|     |                        | 2,2,4-Trimethylpentane |                                   |                |
| 273 | $4.17 \times 10^{-12}$ | 0.611±0.001            | $(2.55 \pm 0.01) \times 10^{-12}$ | Air            |
|     |                        | 0.629                  | $2.62 \times 10^{-12}$            | N <sub>2</sub> |
| 283 | $4.44 \times 10^{-12}$ | 0.634±0.022            | $(2.81 \pm 0.10) \times 10^{-12}$ | Air            |
|     |                        | 0.633                  | $2.81 \times 10^{-12}$            | N <sub>2</sub> |
| 293 | $4.70 \times 10^{-12}$ | 0.625±0.006            | $(2.94 \pm 0.03) \times 10^{-12}$ | Air            |
|     |                        | 0.632                  | $2.97 \times 10^{-12}$            | N <sub>2</sub> |
| 303 | $4.97 \times 10^{-12}$ | 0.638±0.024            | $(3.17 \pm 0.12) \times 10^{-12}$ | Air            |
|     |                        | 0.632                  | $3.14 \times 10^{-12}$            | N <sub>2</sub> |

|                        |                        |                      |                                                             |                       |
|------------------------|------------------------|----------------------|-------------------------------------------------------------|-----------------------|
| 313                    | $5.22 \times 10^{-12}$ | 0.633±0.030<br>0.614 | $(3.30 \pm 0.16) \times 10^{-12}$<br>$3.20 \times 10^{-12}$ | Air<br>N <sub>2</sub> |
| 323                    | $5.48 \times 10^{-12}$ | 0.616±0.008<br>0.608 | $(3.38 \pm 0.04) \times 10^{-12}$<br>$3.33 \times 10^{-12}$ | Air<br>N <sub>2</sub> |
| Methylcyclohexane      |                        |                      |                                                             |                       |
| 273                    | $4.17 \times 10^{-12}$ | 1.806±0.005<br>1.860 | $(7.53 \pm 0.26) \times 10^{-12}$<br>$7.76 \times 10^{-12}$ | Air<br>N <sub>2</sub> |
| 283                    | $4.44 \times 10^{-12}$ | 1.873±0.018<br>1.883 | $(8.31 \pm 0.08) \times 10^{-12}$<br>$8.36 \times 10^{-12}$ | Air<br>N <sub>2</sub> |
| 293                    | $4.70 \times 10^{-12}$ | 1.869±0.017<br>1.835 | $(8.77 \pm 0.06) \times 10^{-12}$<br>$8.62 \times 10^{-12}$ | Air<br>N <sub>2</sub> |
| 303                    | $4.97 \times 10^{-12}$ | 1.848±0.001<br>1.833 | $(9.18 \pm 0.01) \times 10^{-12}$<br>$9.11 \times 10^{-12}$ | Air<br>N <sub>2</sub> |
| 313                    | $5.22 \times 10^{-12}$ | 1.859±0.019<br>1.793 | $(9.70 \pm 0.10) \times 10^{-12}$<br>$9.36 \times 10^{-12}$ | Air<br>N <sub>2</sub> |
| 323                    | $5.48 \times 10^{-12}$ | 1.804±0.022<br>1.742 | $(9.89 \pm 0.12) \times 10^{-12}$<br>$9.55 \times 10^{-12}$ | Air<br>N <sub>2</sub> |
| 2,3,4-Trimethylpentane |                        |                      |                                                             |                       |
| 273                    | $4.17 \times 10^{-12}$ | 1.522±0.023<br>1.527 | $(6.35 \pm 0.09) \times 10^{-12}$<br>$6.37 \times 10^{-12}$ | Air<br>N <sub>2</sub> |
| 283                    | $4.44 \times 10^{-12}$ | 1.477±0.034<br>1.502 | $(6.56 \pm 0.15) \times 10^{-12}$<br>$6.67 \times 10^{-12}$ | Air<br>N <sub>2</sub> |
| 293                    | $4.70 \times 10^{-12}$ | 1.435±0.022<br>1.439 | $(6.74 \pm 0.11) \times 10^{-12}$<br>$6.76 \times 10^{-12}$ | Air<br>N <sub>2</sub> |
| 303                    | $4.97 \times 10^{-12}$ | 1.377±0.014<br>1.379 | $(6.84 \pm 0.07) \times 10^{-12}$<br>$6.85 \times 10^{-12}$ | Air<br>N <sub>2</sub> |
| 313                    | $5.22 \times 10^{-12}$ | 1.355±0.017<br>1.333 | $(7.07 \pm 0.09) \times 10^{-12}$<br>$6.96 \times 10^{-12}$ | Air<br>N <sub>2</sub> |
| 323                    | $5.48 \times 10^{-12}$ | 1.296±0.019<br>1.297 | $(7.10 \pm 0.10) \times 10^{-12}$<br>$7.11 \times 10^{-12}$ | Air<br>N <sub>2</sub> |
| 2-Methylheptane        |                        |                      |                                                             |                       |
| 273                    | $4.17 \times 10^{-12}$ | 1.586±0.188<br>1.654 | $(6.61 \pm 0.78) \times 10^{-12}$<br>$6.90 \times 10^{-12}$ | Air<br>N <sub>2</sub> |
| 283                    | $4.44 \times 10^{-12}$ | 1.499±0.016<br>1.563 | $(6.66 \pm 0.07) \times 10^{-12}$<br>$6.94 \times 10^{-12}$ | Air<br>N <sub>2</sub> |
| 293                    | $4.70 \times 10^{-12}$ | 1.332±0.038<br>1.409 | $(6.26 \pm 0.18) \times 10^{-12}$<br>$6.62 \times 10^{-12}$ | Air<br>N <sub>2</sub> |
| 303                    | $4.97 \times 10^{-12}$ | 1.344±0.092<br>1.335 | $(6.68 \pm 0.46) \times 10^{-12}$<br>$6.64 \times 10^{-12}$ | Air<br>N <sub>2</sub> |
| 313                    | $5.22 \times 10^{-12}$ | 1.396±0.017<br>1.318 | $(7.29 \pm 0.09) \times 10^{-12}$<br>$6.88 \times 10^{-12}$ | Air<br>N <sub>2</sub> |
| 323                    | $5.48 \times 10^{-12}$ | 1.339±0.035<br>1.312 | $(7.34 \pm 0.19) \times 10^{-12}$<br>$7.19 \times 10^{-12}$ | Air<br>N <sub>2</sub> |



| Nonane     |                        |             |                                   |                |
|------------|------------------------|-------------|-----------------------------------|----------------|
| 273        | $4.17 \times 10^{-12}$ | 1.882±0.008 | $(7.85 \pm 0.04) \times 10^{-12}$ | Air            |
|            |                        | 2.009       | $8.38 \times 10^{-12}$            | N <sub>2</sub> |
| 283        | $4.44 \times 10^{-12}$ | 1.924±0.003 | $(8.54 \pm 0.02) \times 10^{-12}$ | Air            |
|            |                        | 1.982       | $8.80 \times 10^{-12}$            | N <sub>2</sub> |
| 293        | $4.70 \times 10^{-12}$ | 1.858±0.039 | $(8.73 \pm 0.18) \times 10^{-12}$ | Air            |
|            |                        | 1.888       | $8.87 \times 10^{-12}$            | N <sub>2</sub> |
| 303        | $4.97 \times 10^{-12}$ | 1.909±0.016 | $(9.49 \pm 0.08) \times 10^{-12}$ | Air            |
|            |                        | 1.917       | $9.53 \times 10^{-12}$            | N <sub>2</sub> |
| 313        | $5.22 \times 10^{-12}$ | 1.950±0.167 | $(1.02 \pm 0.09) \times 10^{-12}$ | Air            |
|            |                        | 1.858       | $9.70 \times 10^{-12}$            | N <sub>2</sub> |
| 323        | $5.48 \times 10^{-12}$ | 1.917±0.040 | $(1.05 \pm 0.02) \times 10^{-11}$ | Air            |
|            |                        | 1.842       | $1.01 \times 10^{-11}$            | N <sub>2</sub> |
| n-Decane   |                        |             |                                   |                |
| 273        | $4.17 \times 10^{-12}$ | 2.483±0.608 | $(1.04 \pm 0.25) \times 10^{-11}$ | Air            |
|            |                        | 2.391       | $9.97 \times 10^{-12}$            | N <sub>2</sub> |
| 283        | $4.44 \times 10^{-12}$ | 2.237±0.008 | $(9.93 \pm 0.04) \times 10^{-12}$ | Air            |
|            |                        | 2.309       | $1.03 \times 10^{-11}$            | N <sub>2</sub> |
| 293        | $4.70 \times 10^{-12}$ | 2.225±0.181 | $(1.05 \pm 0.08) \times 10^{-11}$ | Air            |
|            |                        | 2.232       | $1.05 \times 10^{-11}$            | N <sub>2</sub> |
| 303        | $4.97 \times 10^{-12}$ | 2.206±0.095 | $(1.10 \pm 0.05) \times 10^{-11}$ | Air            |
|            |                        | 2.280       | $1.2132 \times 10^{-11}$          | N <sub>2</sub> |
| 313        | $5.22 \times 10^{-12}$ | 2.278±0.050 | $(1.19 \pm 0.03) \times 10^{-11}$ | Air            |
|            |                        | 2.240       | $1.17 \times 10^{-11}$            | N <sub>2</sub> |
| 323        | $5.48 \times 10^{-12}$ | 2.261±0.083 | $(1.24 \pm 0.05) \times 10^{-11}$ | Air            |
|            |                        | 2.193       | $1.20 \times 10^{-11}$            | N <sub>2</sub> |
| n-Undecane |                        |             |                                   |                |
| 273        | $4.17 \times 10^{-12}$ | 2.426       | $1.01 \times 10^{-11}$            | Air            |
|            |                        | 2.598       | $1.08 \times 10^{-11}$            | N <sub>2</sub> |
| 283        | $4.44 \times 10^{-12}$ | 2.425±0.032 | $(1.08 \pm 0.02) \times 10^{-11}$ | Air            |
|            |                        | 2.488       | $1.10 \times 10^{-11}$            | N <sub>2</sub> |
| 293        | $4.70 \times 10^{-12}$ | 2.287±0.008 | $(1.07 \pm 0.01) \times 10^{-11}$ | Air            |
|            |                        | 2.374       | $1.12 \times 10^{-11}$            | N <sub>2</sub> |
| 303        | $4.97 \times 10^{-12}$ | 2.288±0.261 | $(1.14 \pm 0.13) \times 10^{-11}$ | Air            |
|            |                        | 2.396       | $1.19 \times 10^{-11}$            | N <sub>2</sub> |
| 313        | $5.22 \times 10^{-12}$ | 2.456±0.086 | $(1.28 \pm 0.05) \times 10^{-11}$ | Air            |
|            |                        | 2.337       | $1.22 \times 10^{-11}$            | N <sub>2</sub> |
| 323        | $5.48 \times 10^{-12}$ | 2.446±0.065 | $(1.34 \pm 0.04) \times 10^{-11}$ | Air            |
|            |                        | 2.350       | $1.29 \times 10^{-11}$            | N <sub>2</sub> |

<sup>a</sup><sup>b</sup>The error bar was taken as  $2\sigma$ .

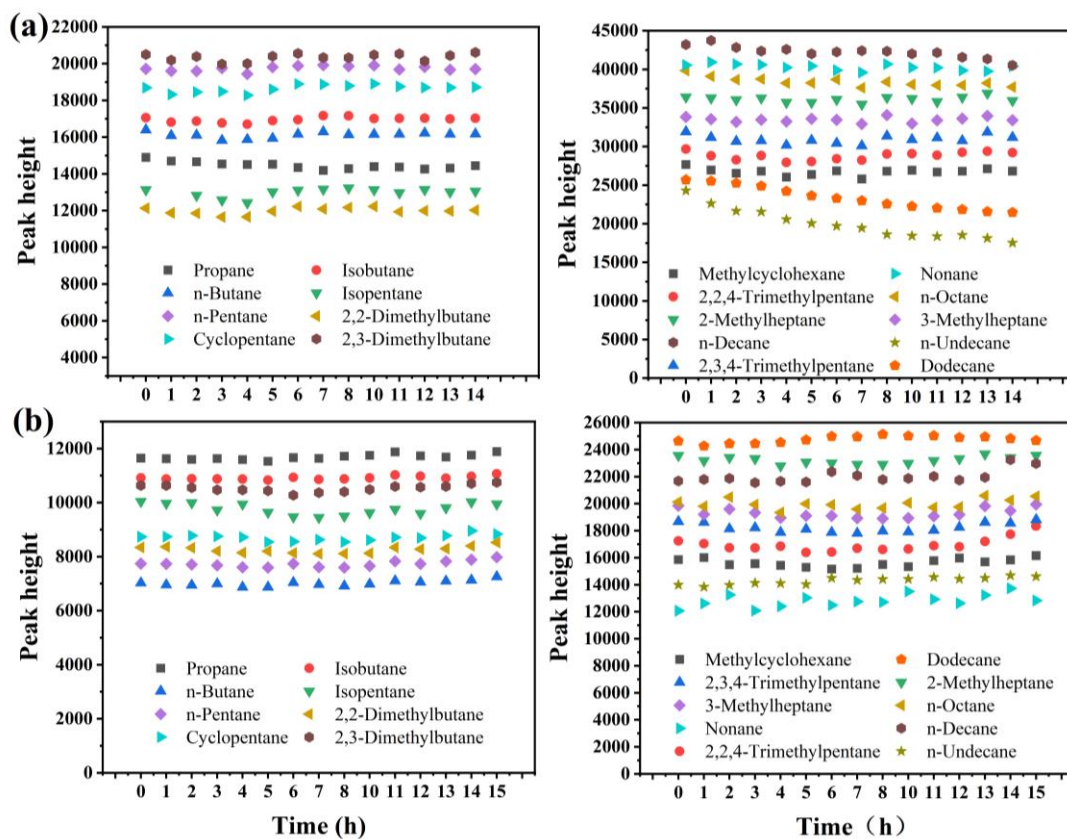

**Figure S1.** (a) Peak height of C<sub>3</sub>-C<sub>11</sub> alkanes in Alkanes+N<sub>2</sub>+dark at 0-14 h. (b) Peak height of C<sub>3</sub>-C<sub>11</sub> alkanes in Alkanes+N<sub>2</sub>+H<sub>2</sub>O<sub>2</sub>+dark at 0-15h. The following data have been displaced for reasons of clarity: a) Propane, Isobutane, n-Butane, Isopentane, 2,2-Dimethylbutane, Methylcyclohexane, 2,2,4-Trimethylpentane, 2,3,4-Trimethylpentane, 2-Methylheptane, 3-Methylheptane, n-Undecane, Ducedane vertically displaced by 8000, 2000, -3000, -6000, -8000, -4000, -4000, -2500, -1000, -4000, -12000, 8000 units, respectively; b) Propane, Isobutane, n-Butane, n-pentane, Cyclopentane, 2,2-Dimethylbutane, 2,3,4-Trimethylpentane, 2-Methylheptane, Nonane, n-Decane, n-Undecane, Ducedane vertically displaced by 8000, 3000, -3000, -2000, -2500, -1000, 1000, 4000, -8000,1000,-1500,17000 units, respectively.

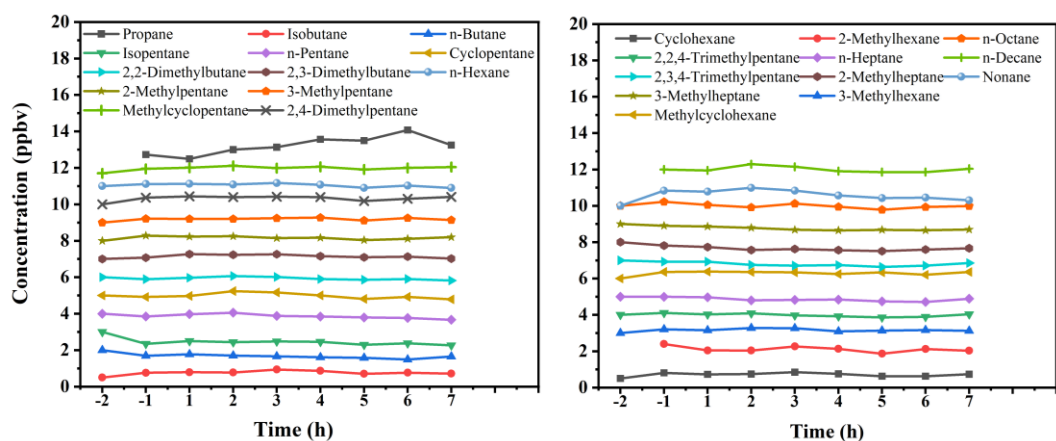

**Figure S2.** Concentration of C3-C11 alkanes in Alkanes+N<sub>2</sub>+UV light at different time. The following data have been displaced for reasons of clarity: Propane, Isobutane, n-Butane, Isopentane, n-pentane, Cyclopentane, 2,2-Dimethylbutane, 2,3-Dimethylbutane, 2-Methylpentane, 3-Methylpentane, n-Hexane, Methylcyclopentane, Cyclohexane, 2-Methylhexane, 3-Methylhexane, 2,2,4-Trimethylpentane, n-Heptane, Methylcyclohexane, 2,3,4-Trimethylpentane, 2-Methylheptane, 3-Methylheptane, n-Decane, vertically displaced by -3, -9.5, -8, -7, -6, -5, -4, -3, -2, -1, 1, 1.7, 9.5, -19, -7, -6, -5, -4, -3, -2, -1, 2 units, respectively. The -2 and -1 of abscissa refer to 2 and 1 hours before turning on the light respectively. 1-7 refers to 1-7 hours after turning on the light respectively.

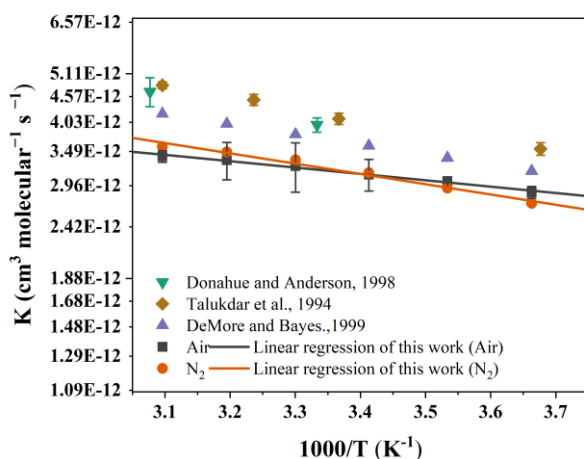

**Figure S3.** Arrhenius plot for the reaction of n-pentane with OH at 273-323 K along with available literature data. The error bar was taken as  $2\sigma$ .

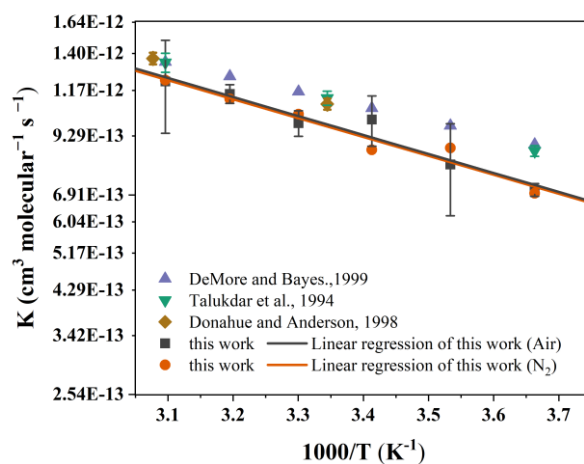

**Figure S4.** Arrhenius plot for the reaction of propane with OH at 273-323 K along with available literature data. The error bar was taken as  $2\sigma$ .

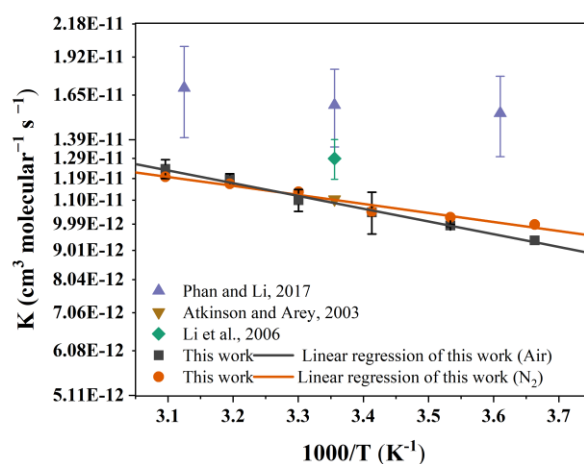

**Figure S5.** Arrhenius plot for the reaction of methylcyclopentane with OH at 273-323 K along with available literature data. The error bar was taken as  $2\sigma$ .

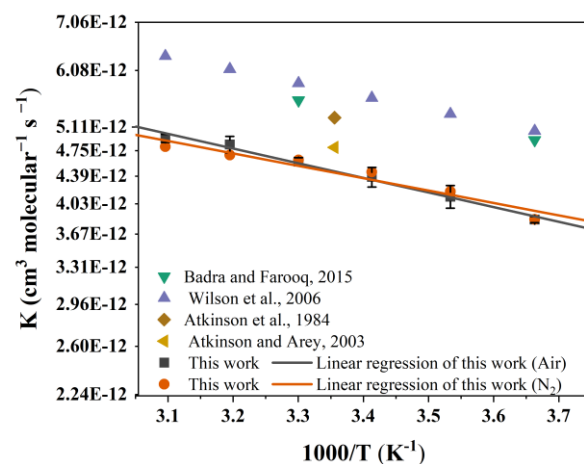

**Figure S6.** Arrhenius plot for the reaction of 2,4-Dimethylpentane with OH at 273-323 K along with available literature data. The error bar was taken as  $2\sigma$ .

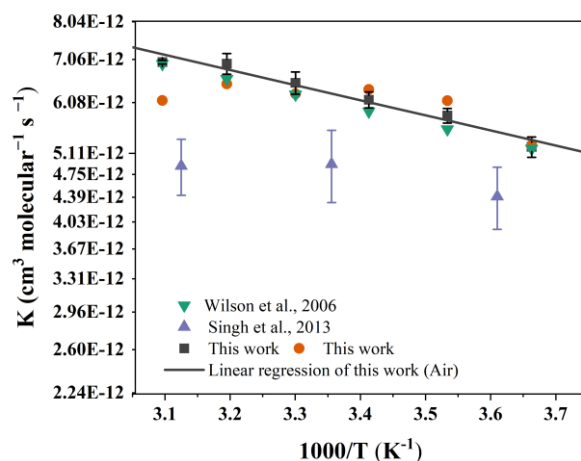

**Figure S7.** Arrhenius plot for the reaction of cyclohexane with OH at 273-323 K along with available literature data. The error bar was taken as  $2\sigma$ .

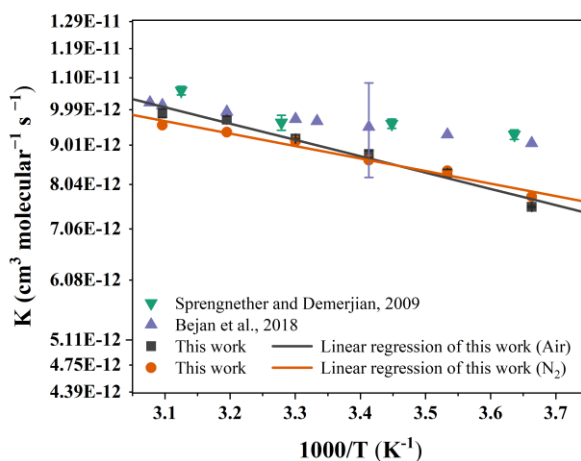

**Figure S8.** Arrhenius plot for the reaction of methylcyclohexane with OH at 273-323 K along with available literature data. The error bar was taken as  $2\sigma$ .

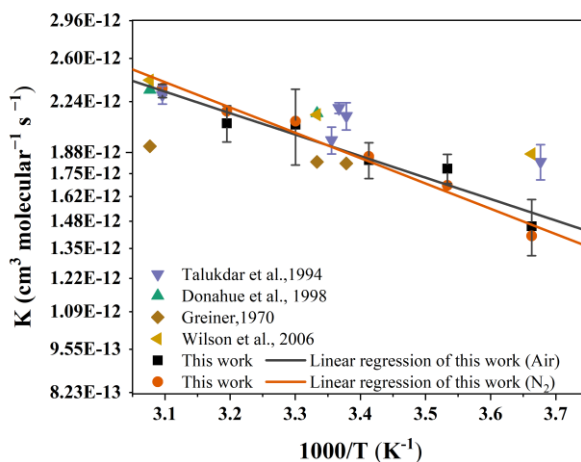

**Figure S9.** Arrhenius plot for the reaction of Isobutane with OH at 273-323 K along with available literature data. The error bar was taken as  $2\sigma$ .

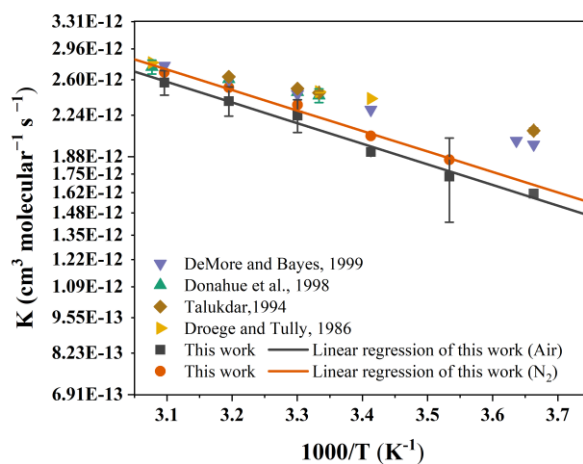

**Figure S10.** Arrhenius plot for the reaction of n-butane with OH at 273-323 K along with available literature data. The error bar was taken as  $2\sigma$ .

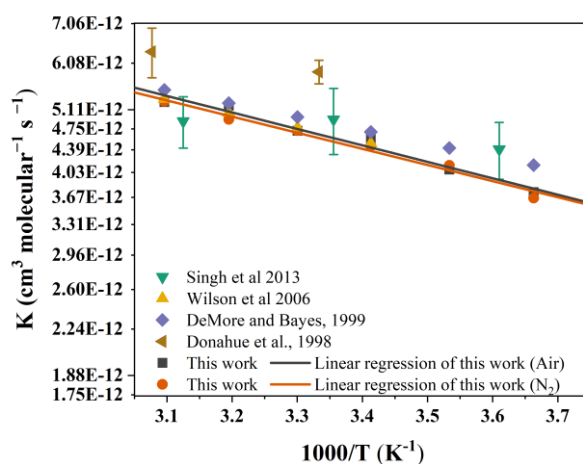

**Figure S11.** Arrhenius plot for the reaction of Cyclopentane with OH at 273-323 K along with available literature data. The error bar was taken as  $2\sigma$ .

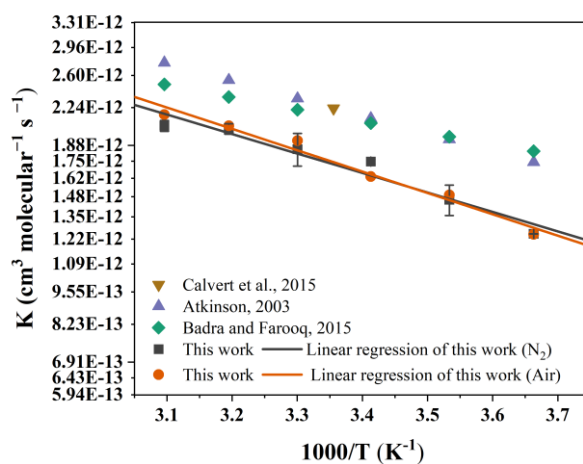

**Figure S12.** Arrhenius plot for the reaction of 2,2-Dimethylbutane with OH at 273-323 K along with available literature data. The error bar was taken as  $2\sigma$ .

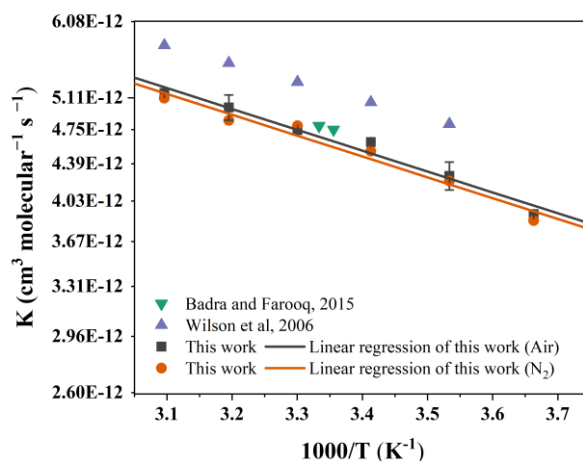

**Figure S13.** Arrhenius plot for the reaction of 2-Methylpentane with OH at 273-323 K along with available literature data. The error bar was taken as  $2\sigma$ .

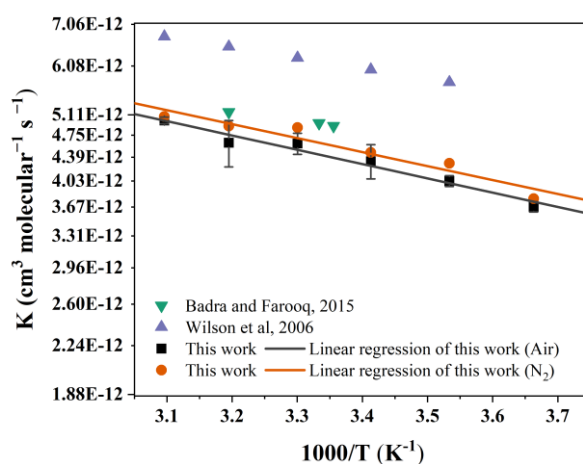

**Figure S14.** Arrhenius plot for the reaction of 3-Methylpentane with OH at 273-323 K along with available literature data. The error bar was taken as  $2\sigma$ .

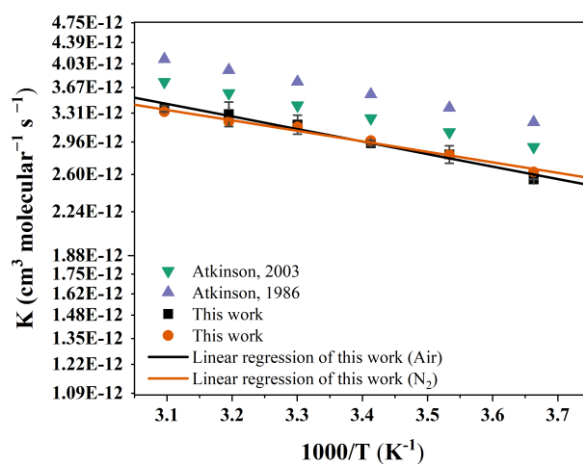

**Figure S15.** Arrhenius plot for the reaction of 2,2,4-Trimethylpentane with OH at 273-323 K along with available literature data. The error bar was taken as  $2\sigma$ .
